# Supplementary material for: Comparative Utility of Acupuncture and Western Medication in the Management of Perimenopausal Insomnia: A Systematic Review and Meta-Analysis
Source: Hindawi journal article supplement (doi:10.1155/2021/5566742), 2021-04-26

## Supplementary Materials

### Appendix 1. Search strategy

The following English search strategy was used for MEDLINE via PubMed, while it was also suitable for other English and Chinese electronic databases:

#### Medline search strategy for English database

| Number | Search terms                                                                                                                                                                                                                                                                                                   |
|--------|----------------------------------------------------------------------------------------------------------------------------------------------------------------------------------------------------------------------------------------------------------------------------------------------------------------|
| 1      | ((randomized controlled trial[Publication Type]) OR (controlled clinical trial[Publication Type]) OR (randomized[Title/Abstract]) OR (placebo[Title/Abstract]) OR (randomly[Title/Abstract]) OR (trial[Title]) OR ("Clinical Trials as Topic"[Mesh:noexp])) NOT ((animals[MeSH Terms]) NOT humans[MeSH Terms]) |
| 2      | insomnia[MeSH Terms]                                                                                                                                                                                                                                                                                           |
| 3      | insomnia                                                                                                                                                                                                                                                                                                       |
| 4      | Sleepless                                                                                                                                                                                                                                                                                                      |
| 5      | sleep disorder                                                                                                                                                                                                                                                                                                 |
| 6      | Sleep initiation dysfunction                                                                                                                                                                                                                                                                                   |
| 7      | Sleep maintain dysfunction                                                                                                                                                                                                                                                                                     |
| 8      | #2 or #3 or #4 or #5 or #6 or #7                                                                                                                                                                                                                                                                               |
| 9      | acupuncture[MeSH Terms]                                                                                                                                                                                                                                                                                        |
| 10     | acupuncture                                                                                                                                                                                                                                                                                                    |
| 11     | electropuncture                                                                                                                                                                                                                                                                                                |
| 12     | manual acupuncture                                                                                                                                                                                                                                                                                             |
| 13     | auricular acupuncture                                                                                                                                                                                                                                                                                          |
| 14     | acupuncture point                                                                                                                                                                                                                                                                                              |
| 15     | acupoint                                                                                                                                                                                                                                                                                                       |
| 16     | #9 or #10 or #11 or #12 or #13 or #14 or #15                                                                                                                                                                                                                                                                   |
| 17     | menopause                                                                                                                                                                                                                                                                                                      |
| 18     | climacteric                                                                                                                                                                                                                                                                                                    |
| 19     | climacterium                                                                                                                                                                                                                                                                                                   |
| 20     | # 17 or #18 or #19                                                                                                                                                                                                                                                                                             |
| 21     | ("1966/01/01"[Date - Publication] : "2020/03/31"[Date - Publication])                                                                                                                                                                                                                                          |
| 22     | #1 and #8 and #16 and #20 and #21                                                                                                                                                                                                                                                                              |

Add terms to the query box

to

Query box

History and Search Details

| Search | Actions | Details | Query                                                                                                                                                                                                                                                                                                                  | Results    | Time     |
|--------|---------|---------|------------------------------------------------------------------------------------------------------------------------------------------------------------------------------------------------------------------------------------------------------------------------------------------------------------------------|------------|----------|
| #22    | ...     | >       | Search: #1 and #8 and #16 and #20 and #21                                                                                                                                                                                                                                                                              | 28         | 03:43:38 |
| #21    | ...     | >       | Search: ("1966/01/01"[Date - Publication] : "2020/03/31"[Date - Publication])                                                                                                                                                                                                                                          | 28,402,440 | 03:42:43 |
| #20    | ...     | >       | Search: # 17 or #18 or #19                                                                                                                                                                                                                                                                                             | 75,903     | 03:40:33 |
| #19    | ...     | >       | Search: climacterium                                                                                                                                                                                                                                                                                                   | 261        | 03:39:28 |
| #18    | ...     | >       | Search: climacteric                                                                                                                                                                                                                                                                                                    | 75,868     | 03:39:12 |
| #17    | ...     | >       | Search: menopause                                                                                                                                                                                                                                                                                                      | 85,553     | 03:38:42 |
| #16    | ...     | >       | Search: #9 or #10 or #11 or #12 or #13 or #14 or #15                                                                                                                                                                                                                                                                   | 34,730     | 03:33:40 |
| #15    | ...     | >       | Search: acupoint                                                                                                                                                                                                                                                                                                       | 11,656     | 03:33:29 |
| #14    | ...     | >       | Search: acupuncture point                                                                                                                                                                                                                                                                                              | 10,506     | 03:33:20 |
| #13    | ...     | >       | Search: auricular acupuncture                                                                                                                                                                                                                                                                                          | 1,448      | 03:33:11 |
| #12    | ...     | >       | Search: manual acupuncture                                                                                                                                                                                                                                                                                             | 1,161      | 03:33:02 |
| #11    | ...     | >       | Search: electropuncture                                                                                                                                                                                                                                                                                                | 71         | 03:32:50 |
| #10    | ...     | >       | Search: acupuncture                                                                                                                                                                                                                                                                                                    | 34,318     | 03:32:40 |
| #9     | ...     | >       | Search: acupuncture[MeSH Terms]                                                                                                                                                                                                                                                                                        | 25,878     | 03:32:31 |
| #8     | ...     | >       | Search: #2 or #3 or #4 or #5 or #6 or #7                                                                                                                                                                                                                                                                               | 117,594    | 03:32:21 |
| #7     | ...     | >       | Search: Sleep maintain dysfunction                                                                                                                                                                                                                                                                                     | 5,332      | 03:32:09 |
| #6     | ...     | >       | Search: Sleep initiation dysfunction                                                                                                                                                                                                                                                                                   | 14,097     | 03:31:56 |
| #5     | ...     | >       | Search: sleep disorder                                                                                                                                                                                                                                                                                                 | 106,499    | 03:31:44 |
| #4     | ...     | >       | Search: Sleepless                                                                                                                                                                                                                                                                                                      | 14,703     | 03:31:34 |
| #3     | ...     | >       | Search: insomnia                                                                                                                                                                                                                                                                                                       | 27,099     | 03:31:22 |
| #2     | ...     | >       | Search: insomnia[MeSH Terms]                                                                                                                                                                                                                                                                                           | 13,828     | 03:30:52 |
| #1     | ...     | >       | Search: ((randomized controlled trial[Publication Type]) OR (controlled clinical trial[Publication Type]) OR (randomized[Title/Abstract]) OR (placebo[Title/Abstract]) OR (randomly[Title/Abstract]) OR (trial[Title]) OR ("Clinical Trials as Topic"[Mesh:noexp])) NOT ((animals[MeSH Terms]) NOT humans[MeSH Terms]) | 1,244,686  | 03:30:34 |

Showing 1 to 22 of 22 entries

## Appendix 2. Valid outcome measures at different timepoint in each study

| Author, year          | Type of outcome measures | Pre-treatment                            | Post-treatment                           | Follow-up                   |
|-----------------------|--------------------------|------------------------------------------|------------------------------------------|-----------------------------|
| Ma 2017 [42]          | Sleep                    | PSQI                                     | PSQI                                     | PSQI (3 months)             |
|                       | Perimenopausal symptoms  | KI,MENQOL,FSH,E2                         | KI,MENQOL,FSH,E2                         | KI,MENQOL,FSH,E2 (3 months) |
| Chen et al 2013 [43]  | Sleep                    | AIS                                      | AIS                                      | /                           |
| Du et al 2017 [44]    | Sleep                    | PSQI                                     | PSQI                                     | /                           |
|                       | Perimenopausal symptoms  | KI,FSH,E2                                | KI,FSH,E2                                | /                           |
|                       | Quality of life          | WHOQOL-BREF                              | WHOQOL                                   | /                           |
| Kang 2015 [46]        | Sleep                    | PSQI                                     | PSQI                                     | /                           |
|                       | Perimenopausal symptoms  | KI                                       | KI                                       | /                           |
| Lai 2016 [47]         | Sleep                    | PSQI                                     | PSQI                                     | /                           |
|                       | Perimenopausal symptoms  | KI                                       | KI                                       | /                           |
| Li 2014 [48]          | Sleep                    | PSQI                                     | PSQI                                     | /                           |
| Li et al 2018 [49]    | Sleep                    | PSQI                                     | PSQI                                     | No report of data (30 days) |
|                       | Perimenopausal symptoms  | FSH,E2,LH                                | FSH,E2,LH                                | No report of data (30 days) |
| Lu et al 2014 [50]    | Sleep                    | PSQI                                     | PSQI                                     | /                           |
| Ma 2014 [45]          | Sleep                    | PSQI                                     | PSQI                                     | /                           |
|                       | Emotional symptoms       | HAMD                                     | HAMD                                     | /                           |
| Qin 2018 [51]         | Sleep                    | PSQI, light-sleep%,<br>deep-sleep%, REM% | PSQI, light-sleep%,<br>deep-sleep%, REM% | /                           |
|                       | Emotional symptoms       | HAMA                                     | HAMA                                     | /                           |
| Yang et al 2017 [52]  | Sleep                    | PSQI                                     | PSQI                                     | /                           |
|                       | Perimenopausal symptoms  | FSH,E2,LH                                | FSH,E2,LH                                | /                           |
| Zhang et al 2017 [53] | Sleep                    | PSQI                                     | PSQI                                     | /                           |
|                       | Perimenopausal symptoms  | KI                                       | KI                                       | /                           |
|                       | Emotional symptoms       | HAMD,HAMA                                | HAMD,HAMA                                | /                           |
| Gao et al 2014 [54]   | Sleep                    | PSQI                                     | PSQI                                     | /                           |
| Ma 2016 [55]          | Sleep                    | PSQI                                     | PSQI                                     | /                           |
|                       | Perimenopausal symptoms  | FSH,E2                                   | FSH,E2                                   | /                           |
| Zhu et al 2016 [56]   | Sleep                    | PSQI                                     | PSQI                                     | /                           |

**Abbreviations:** AIS, Athens Insomnia Scale; PSQI, Pittsburgh sleep quality index; KI, Kupperman index; HAMA, Hamilton Anxiety Scale; HAMD, Hamilton Depression Scale; WHOQOL-BREF, World Health Organization's quality of life scale-brief form questionnaire; REM, Rapid eye movement sleep; FSH, follicle stimulating hormone; LH, luteinizing hormone; E2, estradiol

### Appendix 3. Risk of bias graph

|                  | Random sequence generation (selection bias) | Allocation concealment (selection bias) | Blinding of participants and personnel (performance bias) | Blinding of outcome assessment (detection bias) | Incomplete outcome data (attrition bias) | Selective reporting (reporting bias) | Other bias |
|------------------|---------------------------------------------|-----------------------------------------|-----------------------------------------------------------|-------------------------------------------------|------------------------------------------|--------------------------------------|------------|
| Chen et al 2013  | ?                                           | ?                                       | -                                                         | ?                                               | +                                        | ?                                    | +          |
| Du et al 2017    | +                                           | ?                                       | -                                                         | ?                                               | +                                        | ?                                    | +          |
| Gao et al 2014   | ?                                           | ?                                       | -                                                         | ?                                               | +                                        | ?                                    | +          |
| Kang 2015        | +                                           | ?                                       | -                                                         | ?                                               | +                                        | ?                                    | +          |
| Lai 2016         | +                                           | +                                       | -                                                         | +                                               | +                                        | ?                                    | +          |
| Li 2014          | ?                                           | ?                                       | -                                                         | ?                                               | +                                        | ?                                    | +          |
| Li et al 2018    | +                                           | ?                                       | -                                                         | ?                                               | +                                        | -                                    | +          |
| Lu et al 2014    | +                                           | ?                                       | -                                                         | ?                                               | +                                        | ?                                    | +          |
| Ma 2014          | +                                           | +                                       | -                                                         | ?                                               | -                                        | ?                                    | +          |
| Ma 2016          | +                                           | ?                                       | -                                                         | ?                                               | +                                        | ?                                    | +          |
| Ma et al 2017    | +                                           | ?                                       | -                                                         | ?                                               | +                                        | ?                                    | +          |
| Qin 2018         | +                                           | +                                       | -                                                         | +                                               | +                                        | +                                    | +          |
| Yang et al 2017  | ?                                           | ?                                       | -                                                         | ?                                               | +                                        | ?                                    | +          |
| Zhang et al 2017 | +                                           | ?                                       | -                                                         | ?                                               | +                                        | ?                                    | +          |
| Zhu et al 2016   | +                                           | ?                                       | -                                                         | ?                                               | +                                        | ?                                    | +          |

**Notes:** other bias are assessed based on baseline balance, and source of funding or conflict of interest

#### Appendix 4. Methodological quality assessment of 15 included RCTs

| Author, year          | Random sequence generation | Allocation concealment | Blinding of participants | Blinding of personnel | Blinding of outcome assessment | Incomplete outcome data | Selective outcome reporting | Other bias (baseline balance) | Other bias (funding or conflict of interest) |
|-----------------------|----------------------------|------------------------|--------------------------|-----------------------|--------------------------------|-------------------------|-----------------------------|-------------------------------|----------------------------------------------|
| Ma 2017 [42]          | L                          | U                      | H                        | H                     | U                              | L                       | U                           | L                             | L                                            |
| Chen et al 2013 [43]  | U                          | U                      | H                        | H                     | U                              | L                       | U                           | L                             | U                                            |
| Du et al 2017 [44]    | L                          | U                      | H                        | H                     | U                              | L                       | U                           | L                             | U                                            |
| Kang 2015 [46]        | L                          | U                      | H                        | H                     | U                              | L                       | U                           | L                             | U                                            |
| Lai 2016 [47]         | L                          | L                      | H                        | H                     | L                              | L                       | U                           | L                             | U                                            |
| Li 2014 [48]          | U                          | U                      | H                        | H                     | U                              | L                       | U                           | L                             | U                                            |
| Li et al 2018 [49]    | L                          | U                      | H                        | H                     | U                              | L                       | H                           | L                             | U                                            |
| Lu et al 2014 [50]    | L                          | U                      | H                        | H                     | U                              | L                       | U                           | L                             | U                                            |
| Ma 2014 [45]          | L                          | L                      | H                        | H                     | U                              | H                       | U                           | L                             | U                                            |
| Qin 2018 [51]         | L                          | L                      | H                        | H                     | L                              | L                       | L                           | L                             | L                                            |
| Yang et al 2017 [52]  | U                          | U                      | H                        | H                     | U                              | L                       | U                           | L                             | L                                            |
| Zhang et al 2017 [53] | L                          | U                      | H                        | H                     | U                              | L                       | U                           | L                             | L                                            |
| Gao et al 2014 [54]   | U                          | U                      | H                        | H                     | U                              | L                       | U                           | L                             | U                                            |
| Ma 2016 [55]          | L                          | U                      | H                        | H                     | U                              | L                       | U                           | L                             | U                                            |
| Zhu et al 2016 [56]   | L                          | U                      | H                        | H                     | U                              | L                       | U                           | L                             | L                                            |

**Abbreviations:** L, Low risk; U, Unclear risk; H, High risk.



|                  |                                                                          |          |                                                 |                                                                        |                                                                                                                                                              |                                                                                                                  |                        |                       |                                                           |                                                                       |                                                                                                                                                              |                                                             |                                                                                                                                                                                                                                                                         |                                               |       |                                                              |                                                                          |
|------------------|--------------------------------------------------------------------------|----------|-------------------------------------------------|------------------------------------------------------------------------|--------------------------------------------------------------------------------------------------------------------------------------------------------------|------------------------------------------------------------------------------------------------------------------|------------------------|-----------------------|-----------------------------------------------------------|-----------------------------------------------------------------------|--------------------------------------------------------------------------------------------------------------------------------------------------------------|-------------------------------------------------------------|-------------------------------------------------------------------------------------------------------------------------------------------------------------------------------------------------------------------------------------------------------------------------|-----------------------------------------------|-------|--------------------------------------------------------------|--------------------------------------------------------------------------|
|                  | [54][55][56]                                                             |          |                                                 |                                                                        |                                                                                                                                                              |                                                                                                                  |                        |                       |                                                           |                                                                       |                                                                                                                                                              |                                                             |                                                                                                                                                                                                                                                                         |                                               |       |                                                              |                                                                          |
| (2b) points used | [42][43][44][45]<br>[46][47][48][49]<br>[50][51][52][53]<br>[54][55][56] | 15 (100) | CV4;<br>EX-CA1;<br>EX-HN3;<br>HT7; SP6;<br>ST25 | EX, GV20,<br>HT7, KI3,<br>KI7, KI10,<br>LR3, PC6,<br>SP6, SP9,<br>SP10 | PC6, SP6,<br>Sishenzhen (1.5<br><i>Cun</i> apart from<br>GV20),<br>Dingshen zhen (0.5<br><i>Cun</i> up to<br>EX-HN3,<br>and 0.5<br><i>Cun</i> up to<br>GB14) | EX,<br>EX-HN1,<br>GB13,<br>GB15,<br>GV16,<br>GV20,<br>GV24,<br>scalp<br>acupoint<br>(1 <i>Cun</i> up<br>to GB15) | BL62, KI6,<br>LU7, SI3 | SP6, SP8,<br>Shenguan | BL13,<br>BL15,<br>BL17,<br>BL18,<br>BL20,<br>BL23,<br>HT7 | CV12,<br>EX-HN1,<br>GB20,<br>GV20,<br>HT7, LR3,<br>LR14,<br>SP6, SP15 | PC6, SP6,<br>Sishenzhen (1.5<br><i>Cun</i> apart from<br>GV20),<br>Dingshen zhen (0.5<br><i>Cun</i> up to<br>EX-HN3,<br>and 0.5<br><i>Cun</i> up to<br>GB14) | BL17,<br>BL18,<br>BL23, EX,<br>EX-HN1,<br>GV20,<br>KI3, LR3 | CV12,<br>HT7, KI3,<br>PC6,<br>ST36,<br>ST40,<br>four scalp<br>acupoints<br>(middle<br>1/3 of<br>frontal<br>apical<br>band,<br>posterior<br>1/3 of<br>frontal<br>apical<br>band,<br>anterior<br>1/3 of<br>skull base<br>band,<br>middle<br>1/3 of<br>skull base<br>band) | BL17,<br>BL18, EX,<br>EX-HN1,<br>GV20,<br>LR3 | EX-B2 | EX, HT7,<br>KI3, KI7,<br>KI10,<br>LR3, SP6,<br>SP10,<br>ST36 | CV12, EX,<br>EX-HN1,<br>GV20,<br>GV24,<br>HT7, KI3,<br>LR3, SP9,<br>ST25 |

|                            |                                                                          |               |                                |                                |                  |                                |                                                                      |                  |                                                                                |                                                                                  |                                                                                      |                                                                                       |              |              |                                |              |              |                                                                                 |
|----------------------------|--------------------------------------------------------------------------|---------------|--------------------------------|--------------------------------|------------------|--------------------------------|----------------------------------------------------------------------|------------------|--------------------------------------------------------------------------------|----------------------------------------------------------------------------------|--------------------------------------------------------------------------------------|---------------------------------------------------------------------------------------|--------------|--------------|--------------------------------|--------------|--------------|---------------------------------------------------------------------------------|
| (2c) Depths of insertion   | [42][43][44]<br>[45][47][48][49]<br>[50][51][52][54]                     | 11<br>(73.33) | 0.5 <i>Cun</i>                 | 0.5-1 <i>cun</i>               | 0.5-1 <i>cun</i> | NR                             | 0.2-0.8 <i>cun</i>                                                   | 1-1.5 <i>cun</i> | 10-25 mm                                                                       | 2-20 mm                                                                          | 0.5-1 <i>cun</i>                                                                     | 0.5-1.2 <i>cun</i>                                                                    | 25-40 mm     | NR           | 15-30 mm                       | NR           | NR           |                                                                                 |
| (2d) Responses elicited    | [42][43][44][45]<br>[46][47][48][49]<br>[50][51][52][53]<br>[54][55][56] | 15 (100)      | <i>De-qi</i>                   | <i>De-qi</i>                   | <i>De-qi</i>     | <i>De-qi</i>                   | <i>De-qi</i>                                                         | <i>De-qi</i>     | <i>De-qi</i>                                                                   | <i>De-qi</i>                                                                     | <i>De-qi</i>                                                                         | <i>De-qi</i>                                                                          | <i>De-qi</i> | <i>De-qi</i> | <i>De-qi</i>                   | <i>De-qi</i> | <i>De-qi</i> |                                                                                 |
| (2e) Needle stimulation    | [42][43][44][45]<br>[46][47][48][49]<br>[50][51][52][53]<br>[54][55][56] | 15 (100)      | EA                             | EA                             | EA               | MA                             | MA                                                                   | MA               | MA                                                                             | MA                                                                               | EA                                                                                   | MA                                                                                    | MA           | MA           | MA                             | MA           | MA           |                                                                                 |
| (2f) Needle retention time | [42][43][44][45]<br>[46][47][48][49]<br>[50][51][52][53]<br>[54][56]     | 14<br>(93.33) | 30 min                         | 30 min                         | 30 min           | 40 min                         | 30 min                                                               | 30 min           | 30-40 min                                                                      | 30 min                                                                           | 30 min                                                                               | 30 min                                                                                | 30 min       | 30 min       | 30 min                         | 20 min       | NR           | 20 min                                                                          |
| (2g) Needle type           | [42][43][45]<br>[46][47][49]<br>[50][51][54][56]                         | 10<br>(66.67) | stainless steel<br>(0.3*40 mm) | stainless steel<br>(0.3*40 mm) | NR               | stainless steel<br>(0.3*40 mm) | stainless steel<br>(0.3*25 mm for LU7; 0.3*40 mm for BL62, KI6, SI3) | NR               | stainless steel<br>(0.25*25 mm for HT7; 0.25*40 mm for BL13, BL15, BL17, BL18, | stainless steel<br>(0.3*10 mm for GV16, HT7; 0.3*25 mm for CV12, EX-HN1, EX-HN3, | stainless steel<br>(0.3*25 mm for Sishenzhen, Dingshen zhen; 0.3*50 mm for PC6, SP6) | stainless steel<br>(0.25*25 mm for BL17, BL18, EX-HN1, GV20, KI3, LR3; 0.25*40 mm for | NR           | NR           | stainless steel<br>(0.3*40 mm) | NR           | NR           | stainless steel<br>(0.3*25 mm for EX, EX-HN1, GV20, GV24, HT7, KI3, LR3; 0.3*40 |







|                                          |                                                      |  |                      |                      |                      |                      |                      |                      |                      |                      |                      |                      |                      |                      |                      |                      |                      |
|------------------------------------------|------------------------------------------------------|--|----------------------|----------------------|----------------------|----------------------|----------------------|----------------------|----------------------|----------------------|----------------------|----------------------|----------------------|----------------------|----------------------|----------------------|----------------------|
| description of the control or comparator | [46][47][48][49]<br>[50][51][52][53]<br>[54][55][56] |  | (details in Table 1) | (details in Table 1) | (details in Table 1) | (details in Table 1) | (details in Table 1) | (details in Table 1) | (details in Table 1) | (details in Table 1) | (details in Table 1) | (details in Table 1) | (details in Table 1) | (details in Table 1) | (details in Table 1) | (details in Table 1) | (details in Table 1) |
|------------------------------------------|------------------------------------------------------|--|----------------------|----------------------|----------------------|----------------------|----------------------|----------------------|----------------------|----------------------|----------------------|----------------------|----------------------|----------------------|----------------------|----------------------|----------------------|

**Abbreviations:** NR, no record; Acup, acupuncture; TCM, Traditional Chinese Medicine; MA, manual acupuncture; EA, electroacupuncture; BL13, Feishu; BL15, Xinshu; BL17, Geshu; BL18, Ganshu; BL20, Pishu; BL23, Shenshu; BL62, Shenmai; CV4, Guanyuan; CV12, Zhongwan; EX, Anmian; EX-B2, Jiaji; EX-CA1, Zigong; EX-HN1, Sishencong; EX-HN3, Yintang; GB13, Benshen; GB14, Yangbai; GB15, Toulinqi; GB20, Fengchi; GV14, Dazhui; GV16, Fengfu; GV20, Baihui; GV24, Shenting; HT7, Shenmen; KI3, Taixi; KI6, Zhaohai; KI7, Fuli; KI10, Yingu; LR3, Taichong; LR14, Qimen; LU7, Lieque; PC6, Neiguan; SI3, Houxi; SP6, Sanyinjiao; SP8, Diji; SP9, Yinlingquan; SP10, Xuehai; SP15, Daheng; ST25, Tianshu; ST36, Zusanli; ST40, Fenglong; Shenguan, Tianhuangfuxue; *De-qi* (obtaining Qi) refers to acupuncture-evoked specific sensations such as soreness, numbness, heaviness, and distention at the site of needle placement, and these sensations may spread to other parts of the body

**Appendix 6. Qualitative and quantitative analysis in 15 included studies**

| Interventions VS. controls            | Number of studies | Qualitative analysis | Quantitative analysis                                                                                                          |                   |                      |                          | Publication bias                                                  |
|---------------------------------------|-------------------|----------------------|--------------------------------------------------------------------------------------------------------------------------------|-------------------|----------------------|--------------------------|-------------------------------------------------------------------|
|                                       |                   |                      | pooled effect sizes                                                                                                            | subgroup analysis | sensitivity analysis | meta-regression analysis |                                                                   |
| acupuncture VS. HRT                   | 1                 | All                  | /                                                                                                                              | /                 | /                    | /                        | PSQI: 14 studies (one out of 15 studies used AIS instead of PSQI) |
| acupuncture VS. hypnotics             | 11                | All                  | (i) PSQI: 10 studies<br>(ii) KI: 4 studies<br>(iii) FSH: 3 studies<br>(iv) E2: 3 studies<br>(v) Effectiveness rate: 10 studies | PSQI              | PSQI                 | PSQI                     |                                                                   |
| acupuncture + hypnotics VS. hypnotics | 3                 | All                  | PSQI: 3 studies                                                                                                                | /                 | /                    | /                        |                                                                   |

**Abbreviations:** HRT, hormone replacement therapy; AIS, Athens Insomnia Scale; PSQI, Pittsburgh sleep quality index; KI, Kupperman index; FSH, follicle stimulating hormone; E2, estradiol

**Appendix 7 Acupuncture Vs. Hypnotics in sleep scales (PSQI and AIS)**

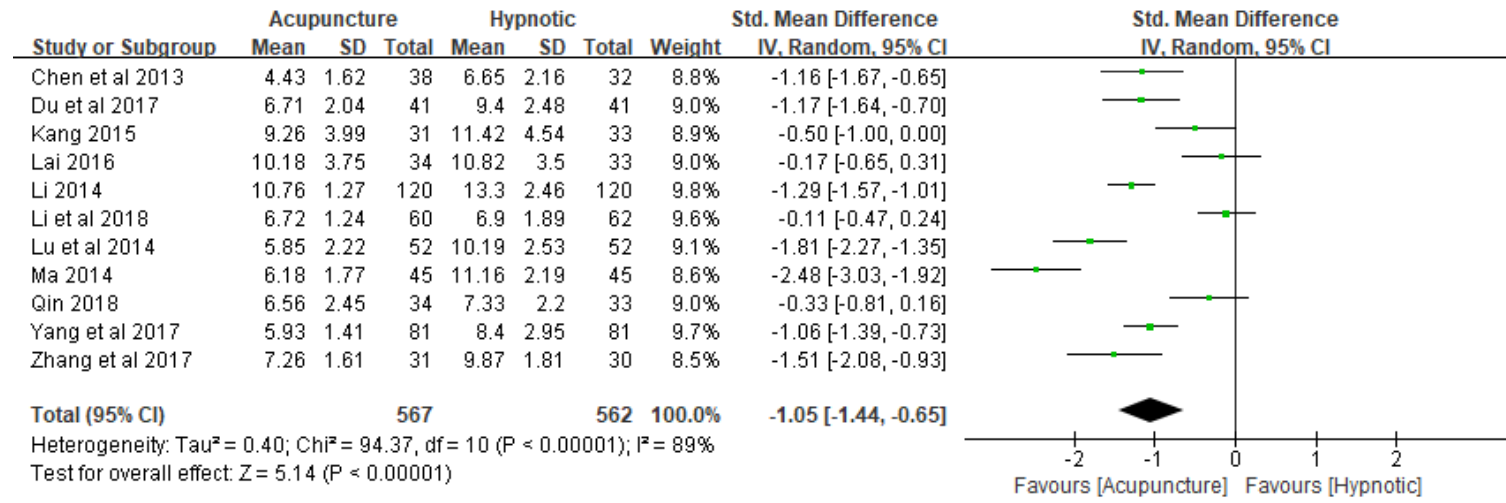

**Appendix 8. Criteria of effectiveness rate reported in the included studies**

| Criteria                                      | Details of guidelines                                                                                              | Involved studies             | Frequency, n (%) |
|-----------------------------------------------|--------------------------------------------------------------------------------------------------------------------|------------------------------|------------------|
| GCTNPCM                                       | <b>Healed:</b> at the end of treatment, sleep pattern is back to normal and more than 6 hours per night            | [42][43][46][47][49][52][54] | 7 (46.67)        |
|                                               | <b>Significant efficacious:</b> sleep pattern is clearly improved and sleep time is increased by more than 3 hours |                              |                  |
|                                               | <b>Efficacious:</b> symptoms are relieved and sleep time is increased by less than 3 hours                         |                              |                  |
|                                               | <b>Inefficacious:</b> symptoms were not relieved                                                                   |                              |                  |
| Reduction rate of PSQI global scores          | <b>Healed:</b> reduction rate of PSQI global scores $\geq$ 75%                                                     | [48][51][53][56]             | 4 (26.67)        |
|                                               | <b>Significant efficacious:</b> 75% > reduction rate of PSQI global scores $\geq$ 50%                              |                              |                  |
|                                               | <b>Efficacious:</b> 50% > reduction rate of PSQI global scores $\geq$ 25%                                          |                              |                  |
|                                               | <b>Inefficacious:</b> reduction rate of PSQI global scores < 25%                                                   |                              |                  |
| Sleep Efficiency Calculation published by WHO | <b>Healed:</b> all symptoms disappeared and sleep efficiency was higher than 75%                                   | [45][50]                     | 2 (13.33)        |
|                                               | <b>Significant efficacious:</b> symptoms alleviated and sleep efficiency was within 65-74%                         |                              |                  |
|                                               | <b>Efficacious:</b> symptoms slightly alleviated and sleep efficiency was within 55-64%                            |                              |                  |
|                                               | <b>Inefficacious:</b> symptoms were not relieved and sleep efficiency was lower than 55%                           |                              |                  |

**Abbreviations:** GCTNPCM, Guideline for Clinical Trials of New Patent Chinese Medicines; Reduction rate of PSQI global scores, reduction rate= [(PSQI global scores at pre-treatment - PSQI global scores at post-treatment)/(PSQI global scores at pre-treatment)] X 100%; sleep efficiency = (total sleep time/time in bed) X 100%

### Appendix 9. Subgroup analysis of PSQI and KI (Acupuncture Vs. Hypnotic)

| Basis for subgroup classification | All trials or subgroup title                               | No. of Studies | No. of participants | Statistical method                   | Effect size           | <i>p</i> | <i>I</i> <sup>2</sup> | Subgroup analysis results                                 |
|-----------------------------------|------------------------------------------------------------|----------------|---------------------|--------------------------------------|-----------------------|----------|-----------------------|-----------------------------------------------------------|
| PSQI                              | All trials                                                 | 10             | 1059                | Mean Difference (IV, Random, 95% CI) | -2.38 [-3.38, -1.37]  | < 0.01   | 93                    |                                                           |
| Acupuncture stimulations          | (i) MA                                                     | 8              | 887                 | Mean Difference (IV< random, 95% CI) | -1.99 [-3.01, -0.98]  | < 0.01   | 91                    | Chi <sup>2</sup> statistic 2.18, df = 1, <i>p</i> = 0.14  |
|                                   | (ii) EA                                                    | 2              | 172                 | Mean Difference (IV< random, 95% CI) | -3.85 [-6.10, -1.61]  | < 0.01   | 92                    |                                                           |
| Type of hypnotics                 | (i) Estazolam                                              | 8              | 870                 | Mean Difference (IV, Random, 95% CI) | -2.87 [-3.71, -2.03]  | < 0.01   | 87                    | Chi <sup>2</sup> statistic 27.34, df = 2, <i>p</i> < 0.01 |
|                                   | (ii) Alprazolam                                            | 1              | 122                 | Mean Difference (IV< random, 95% CI) | -0.18 [-0.75, 0.39]   | 0.53     | /                     |                                                           |
|                                   | (iii) Eszopiclone                                          | 1              | 67                  | Mean Difference (IV, Random, 95% CI) | -0.64 [-2.38, 1.10]   | 0.47     | /                     |                                                           |
| Acupuncture methods               | (i) body acupuncture alone                                 | 6              | 661                 | Mean Difference (IV< random, 95% CI) | -1.88 [-3.17, -0.59]  | < 0.01   | 94                    | Chi <sup>2</sup> statistic 1.72, df = 1, <i>p</i> = 0.19  |
|                                   | (ii) combination of body acupuncture and scalp acupuncture | 4              | 398                 | Mean Difference (IV, Random, 95% CI) | -3.16 [-4.57, -1.75]  | < 0.01   | 87                    |                                                           |
| KI                                | All trials                                                 | 4              | 274                 | Mean Difference (IV, Random, 95% CI) | -5.95 [-10.68, -1.21] | < 0.01   | 96                    |                                                           |
| Acupuncture stimulations          | (i) MA                                                     | 3              | 192                 | Mean Difference (IV< random, 95% CI) | -6.24 [-12.78, 0.30]  | 0.06     | 97                    | Chi <sup>2</sup> statistic 0.12, df = 1, <i>p</i> = 0.73  |
|                                   | (ii) EA                                                    | 1              | 82                  | Mean Difference (IV< random, 95% CI) | -5.05 [-7.09, -3.01]  | < 0.01   | /                     |                                                           |

|                     |                                                            |   |     |                                      |                         |        |    |                                                      |
|---------------------|------------------------------------------------------------|---|-----|--------------------------------------|-------------------------|--------|----|------------------------------------------------------|
| Type of hypnotics   | (i) Estazolam                                              | 3 | 207 | Mean Difference (IV, Random, 95% CI) | -3.88 [-6.12, -1.63]    | < 0.01 | 71 | Chi <sup>2</sup> statistic 30.43, df = 1, $p < 0.01$ |
|                     | (ii) Eszopiclone                                           | 1 | 67  | Mean Difference (IV, Random, 95% CI) | -11.61 [-13.19, -10.03] | < 0.01 | /  |                                                      |
| Acupuncture methods | (i) body acupuncture alone                                 | 2 | 128 | Mean Difference (IV, random, 95% CI) | -6.80 [-16.22, 2.61]    | 0.16   | 99 | Chi <sup>2</sup> statistic 0.13, df = 1, $p = 0.72$  |
|                     | (ii) combination of body acupuncture and scalp acupuncture | 2 | 146 | Mean Difference (IV, Random, 95% CI) | -5.06 [-6.70, -3.41]    | < 0.01 | 0  |                                                      |

**Abbreviations:** MA, manual acupuncture; EA, electroacupuncture



## Appendix 10. Figures of meta-regression

Supplemental Figure 1. Univariate meta-regression based on study sample size as covariate

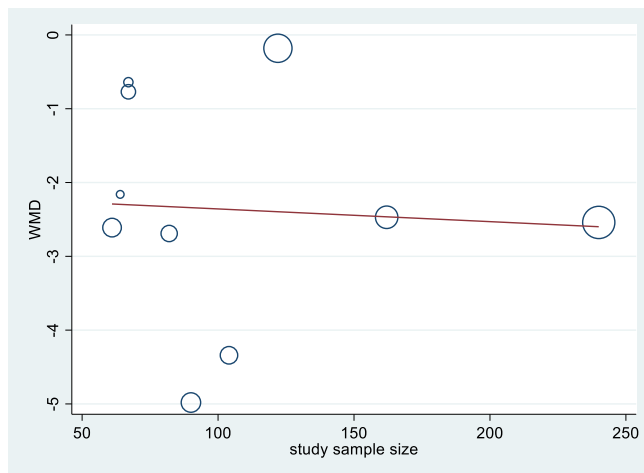

Supplemental Figure 2. Univariate meta-regression based on acupuncture stimulation as covariate

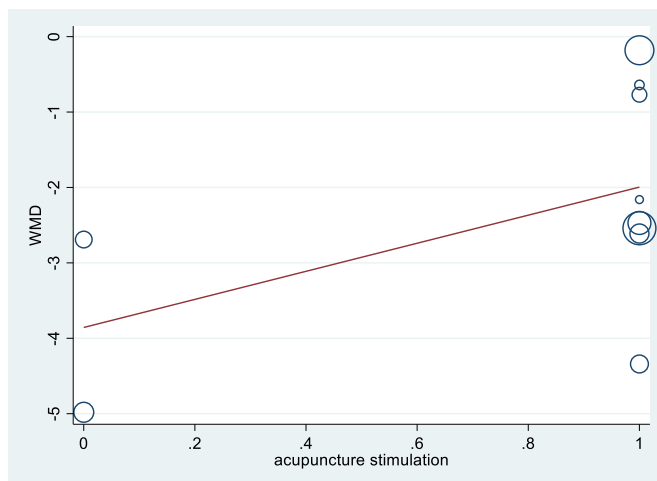

Supplemental Figure 3. Univariate meta-regression based on acupuncture methods as covariate

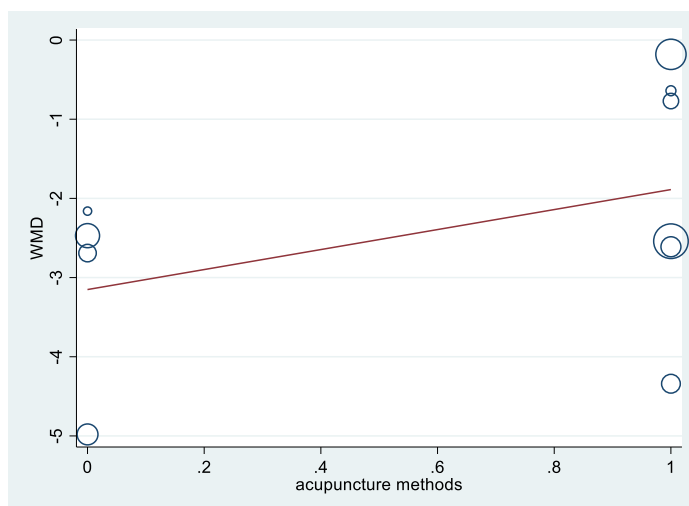

Supplement: f1 [file 5566742.f1.pdf]
